# Supplementary material for: Clinical Impact of Immune Checkpoint Inhibitor (ICI) Response, DNA Damage Repair (DDR) Gene Mutations and Immune-Cell Infiltration in Metastatic Melanoma Subtypes
Source: MDPI journal article supplement (doi:10.3390/medsci10020026), 2022-05-24
Supplement: s1 [file s1]

Table S1: Patient information and detected mutations.

| Study ID        | Age at metastatic diagnosis | Diagnosis/Tumor    | Primary site | Melanoma subtype | Surgical/metastatic site | Detected mutations from panel                                                                                                                                                                                                                                                                       | Rounds of ICI             | Chemo/targeted therapy | PFS (mo) | OS (mo) |
|-----------------|-----------------------------|--------------------|--------------|------------------|--------------------------|-----------------------------------------------------------------------------------------------------------------------------------------------------------------------------------------------------------------------------------------------------------------------------------------------------|---------------------------|------------------------|----------|---------|
| <b>Mel-I001</b> | 55 Years                    | Malignant Melanoma | Scalp        | HNMM             | Radical Neck dissection  | BRAF p.V600E; BRAF p.G469R; ERBB2 p.S442L                                                                                                                                                                                                                                                           | IPILIMUMAB                | Dabrafenib/Trametinib  | 2.9      | 40.5    |
| <b>Mel-I002</b> | 59 Years                    | Malignant Melanoma | Left pinna   | HNMM             | Left lung, upper lobe    | MYCL p.D198N; NRAS p.Q61H; PIK3R1 p.Q572*                                                                                                                                                                                                                                                           | IPILIMUMAB                |                        | 1.5      | 10.0    |
| <b>Mel-I003</b> | 58 Years                    | Malignant Melanoma | Right calf   | CM               | Right leg calf           | NRAS p.Q61R; CDKN2A p.R80*                                                                                                                                                                                                                                                                          | IPILIMUMAB                |                        | 0.4      | 80.9    |
| <b>Mel-I004</b> | 44 Years                    | Malignant Melanoma | Left cheek   | HNMM             | Popliteal right knee     | NTRK1 p.E581K; RICTOR splice; PIK3R1 p.P211S; APC p.L407F; RAD50 p.Q508*; MET p.S663L; PRKDC p.3541S; PTEN p.Q171*; FGFR2 p.P595S; FGFR2 p.D138N; FGFR2 p.G80R; POLE p.P172S; BRCA2 p.S1261F; BRCA2 p.P2612S; , MAP2K3 p.E341K; NF1 p.W571*; NF1 p.V921L; RPTOR p.A274V; GNAS p.D17N; NF1 p.L1441fs | IPILIMUMAB; Pembrolizumab | DTIC                   | 6.5      | 47.8    |

|                 |          |                                          |               |       |                          |                                                                                                                                                                                      |                           |                        |     |      |
|-----------------|----------|------------------------------------------|---------------|-------|--------------------------|--------------------------------------------------------------------------------------------------------------------------------------------------------------------------------------|---------------------------|------------------------|-----|------|
| <b>Mel-I005</b> | 78 Years | Ocular melanoma                          | Ocular        | UM    | Liver metastasectomy     | ERBB3 p.S1083C; GNAQ p.Q209L; PRKDC p.S2511P; RB1 p.T12P                                                                                                                             | IPILIMUMAB                |                        | 1.5 | 15.5 |
| <b>Mel-I006</b> | 73 Years | Malignant Melanoma (arcuate lentiginous) | Left toe      | AM/MM | Toe, Lymph Node          | BRAF p.D594A; BRCA2 p.I27M; NRAS p.D33E                                                                                                                                              | IPILIMUMAB                | Dartmouth chemotherapy | 7.4 | 27.7 |
| <b>Mel-I007</b> | 58 Years | Malignant Melanoma                       | Scalp         | HNMM  | Scalp Lesion             | GNA11 p.Q209L; KIT p.T380M                                                                                                                                                           | IPILIMUMAB                |                        | 2.8 | 5.1  |
| <b>Mel-I008</b> | 60 Years | Malignant Melanoma                       | Elbow         | CM    | Skin, left elbow         | APC p.P2540S; ATR p.Q1627*; BRAF p.V600K; DDR2 p.P389L; GNAS p.A446V; KDR p.G537K; MYC p.K304E; NF1 p.S1684F; SMO p.R291Q                                                            | IPILIMUMAB                |                        | 9.1 | 50.7 |
| <b>Mel-I009</b> | 78 Years | Malignant Melanoma                       | Cutaneous     | CM    | Skin, left jaw, excision | ALK p.D602N; APC p.V1675A; ARID1A p.Q802*; BRAF p.D594N; CDKN2A p.R80*; FGFR4 p.C271Y; KRAS p.G12N; NF1 splice; NF1 p.Q1515*; PRKDC p.C2552R; RB1 p.W563L; ROS1 p.S79L; TSC2 p.L567P | IPILIMUMAB                |                        | 0.5 | 1.8  |
| <b>Mel-I010</b> | 57 Years | Malignant Melanoma                       | Perianal skin | AM/MM | Perianal skin/mucosa     | KIT p.L576P                                                                                                                                                                          | IPILIMUMAB; Pembrolizumab |                        | 2.7 | 14.1 |

|                 |          |                    |                           |     |                          |                                                                                                                                                                 |                                       |                       |      |      |
|-----------------|----------|--------------------|---------------------------|-----|--------------------------|-----------------------------------------------------------------------------------------------------------------------------------------------------------------|---------------------------------------|-----------------------|------|------|
| <b>Mel-I011</b> | 61 Years | Malignant melanoma | Cutaneous, back           | CM  | Lymph node/skin excision | BRCA1 p.N1840S                                                                                                                                                  | IPILIMUMAB + NIVOLUMAB;<br>IPILIMUMAB |                       | 16.7 | 20.1 |
| <b>Mel-I012</b> | 60 Years | Malignant melanoma | Left leg                  | CM  | Left leg lesion          | BCL6 p.R24C; CDKN2A splice;<br>ERBB2 p.D1019N; NRAS p.Q61R; ROS1 splice                                                                                         | IPILIMUMAB                            |                       | 3.5  | 52.3 |
| <b>Mel-I013</b> | 62 Years | Ocular melanoma    | Ocular                    | UM  | Liver metastasectomy     | ARID1A p.P912L; GNAQ p.Q209P                                                                                                                                    | IPILIMUMAB                            |                       | 39.7 | 50.1 |
| <b>Mel-I014</b> | 70 Years | Malignant melanoma | Cutaneous, right leg      | CM  | Skin excision right leg  | ATR p.R515C; CTNNB1 p.G575V; MTOR p.E1610K; NRAS p.Q61R                                                                                                         | IPILIMUMAB;<br>Pembrolizumab          |                       | 3.5  | 27.4 |
| <b>Mel-I015</b> | 65 Years | Malignant melanoma | Face                      | HNM | Left neck mass excision  | ARID1A p.S486F; ATM p.R1086C; BRAF p.L584F; BRCA2 p.S146F; BRCA2 p.F1634S; KDR splice; MAP2K1 p.F53L; MAP2K1 p.D67V; MET p.P1171L; MTOR p.P404L; PIK3CA p.E545K | IPILIMUMAB;<br>Pembrolizumab          |                       | 2.7  | 27.3 |
| <b>Mel-I016</b> | 64 Years | Ocular melanoma    | Ocular                    | UM  | Liver metastasectomy     | GNAQ p.Q209P; MTOR p.R1009Q; PRKDC p.R1360del                                                                                                                   | IPILIMUMAB;<br>Pembrolizumab          | Dartmouth chemo       | 3.2  | 23.5 |
| <b>Mel-I017</b> | 62 Years | Malignant melanoma | Cutaneous, abdominal wall | CM  | Wedge resection of lung  | AR p.P555S; ARID1A p.P1456L; BCL6 p.P151S; BRD4 p.*723L; CDKN2A p.H98Y; GNAS p.P541L;                                                                           | IPILIMUMAB;<br>Pembrolizumab          | Dartmouth chemo, DTIC | 3.5  | 35.6 |

|                 |          |                    |                         |     |                           |                                                                                                                                                                                                                             |                                       |                                        |      |       |
|-----------------|----------|--------------------|-------------------------|-----|---------------------------|-----------------------------------------------------------------------------------------------------------------------------------------------------------------------------------------------------------------------------|---------------------------------------|----------------------------------------|------|-------|
|                 |          |                    |                         |     |                           | KDR p.A1218T; NF1 p.Q282*; NF1 p.R2517*; PALB2 p.I1180M                                                                                                                                                                     |                                       |                                        |      |       |
| <b>Mel-I018</b> | 41 Years | Malignant melanoma | Right knee              | CM  | Skin, right knee excision | ARID1A p.P1469L; ARID1A p.T1470fs; BRAF p.V600E; MYCN p.S369N                                                                                                                                                               | IPILIMUMAB; Pembrolizumab             | DABRAFENIB/TRAMETINIB; Dartmouth chemo | 5.3  | 100.7 |
| <b>Mel-I019</b> | 61 Years | Malignant melanoma | Cutaneous               | CM  | Skin, right arm           | NF1 p.L2073F; NRAS p.Q61R; POLE p.P172R; ROS1 p.R1035*                                                                                                                                                                      | IPILIMUMAB; IPILIMUMAB; Pembrolizumab |                                        | 2.8  | 63.4  |
| <b>Mel-I020</b> | 68 Years | Malignant melanoma | Cutaneous, right leg    | CM  | Right groin node          | BRCA2 p.G1761E; NRAS p.Q61K; NTRK1 p.V200G; ROS1 p.E2265D                                                                                                                                                                   | IPILIMUMAB; Pembrolizumab             |                                        | 19.4 | 53.6  |
| <b>Mel-I021</b> | 62 Years | Ocular melanoma    | Ocular                  | UM  | Liver metastasectomy      | BRD4 p.R326Q; GNAQ p.Q209L                                                                                                                                                                                                  | IPILIMUMAB                            |                                        | 2.8  | 10.7  |
| <b>Mel-I023</b> | 70 Years | Malignant melanoma | Radical neck dissection | HNM | Radical neck dissection   | ALK p.G667E; ALK p.E405K; CDH1 p.V473I; CHEK2 p.R517G; GNAS p.P352F; GNAS p.P465S; HRAS p.G13E; KDR p.R1032Q; NF1 p.Q853*; NF1 p.R1241*; NF1 p.E1436K; NTRK1 p.D596N; POLD1 p.P1102S; PRKDC splice; RB1 p.Q35*; RB1 p.Q685* | PEMBROLIZUMAB                         |                                        | 7.5  | 23.8  |

|                      |          |                       |       |     |                         |               |                              |  |     |           |
|----------------------|----------|-----------------------|-------|-----|-------------------------|---------------|------------------------------|--|-----|-----------|
| <b>Mel-<br/>I025</b> | 70 Years | Malignant<br>melanoma | Scalp | HNM | Liver<br>metastasectomy | GNA11 p.Q209L | IPILIMUMAB;<br>Pembrolizumab |  | 3.4 | 177.<br>7 |
|----------------------|----------|-----------------------|-------|-----|-------------------------|---------------|------------------------------|--|-----|-----------|
